# Supplementary material for: Non-equilibrium kinetics for improving ionic conductivity in garnet solid electrolyte
Source: Royal Society of Chemistry journal article supplement (doi:10.1039/d2mh01311h), 2023-01-01
Supplement: d2mh01311h1.pdf [file d2mh01311h1.pdf]

## **Supporting Information**

### **Non-equilibrium Kinetics for improving Ionic Conductivity in Garnet Solid Electrolyte**

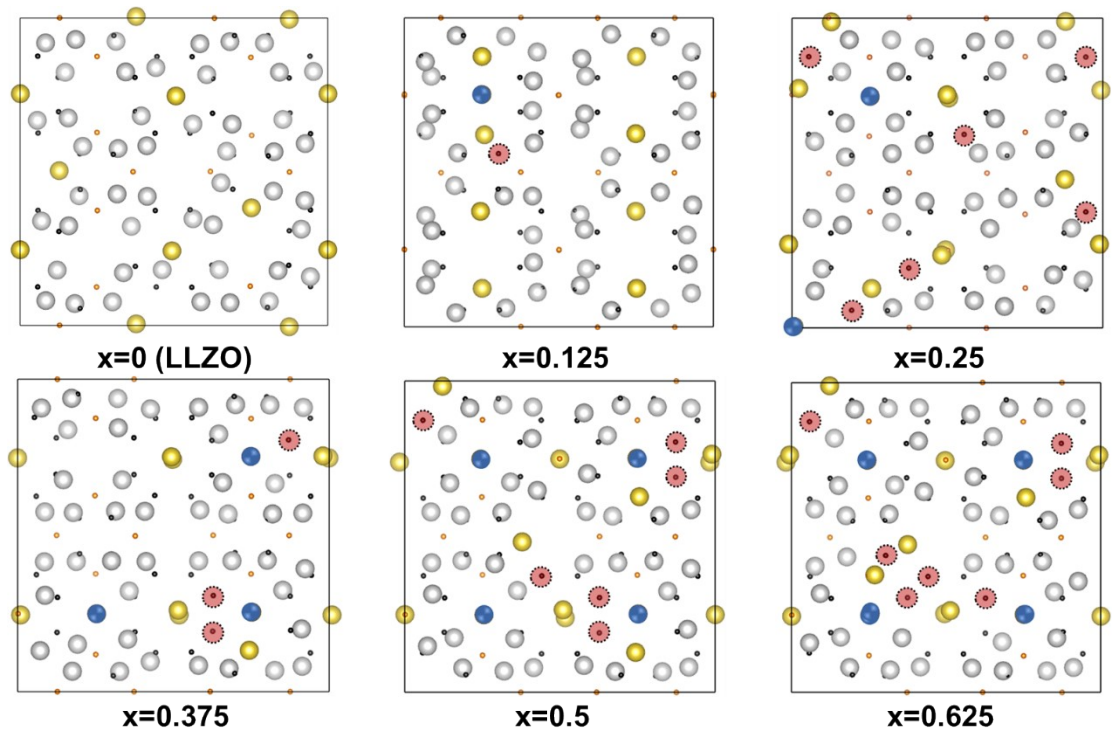

**Figure S1**  $\text{Li}_{24d}$  (yellow),  $\text{Li}_{48g}$  (gray),  $\text{V}_{48g}$  (red) and Ta (dark blue) ions distribution in  $\text{Li}_{7-x}\text{La}_3\text{Zr}_{2-x}\text{Ta}_x\text{O}_{12}$  ( $x=0, 0.125, 0.25, 0.375, 0.5$  and  $0.625$ ) crystal.

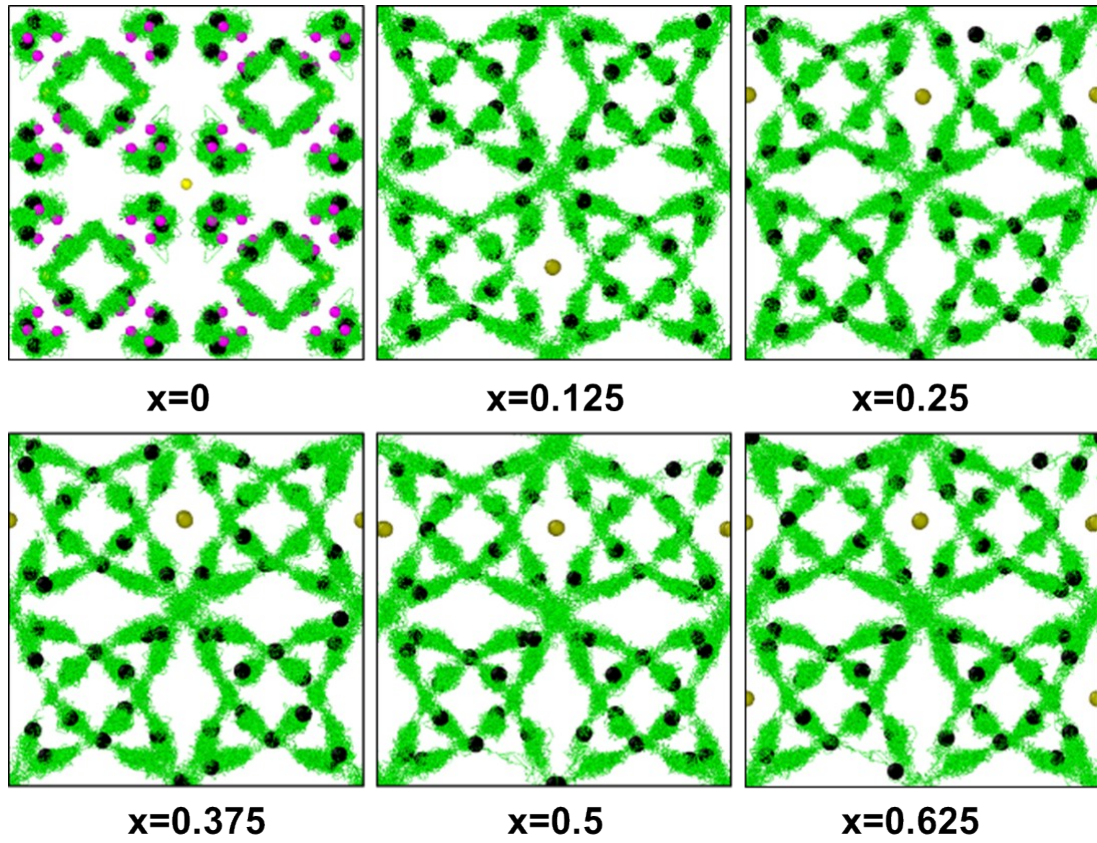

**Figure S2** Lithium trajectories with continual Ta adoptions in  $\text{Li}_{7-x}\text{La}_3\text{Zr}_{2-x}\text{Ta}_x\text{O}_{12}$  ( $x=0, 0.125, 0.25, 0.375, 0.5$  and  $0.625$ ) by AIMD calculations.

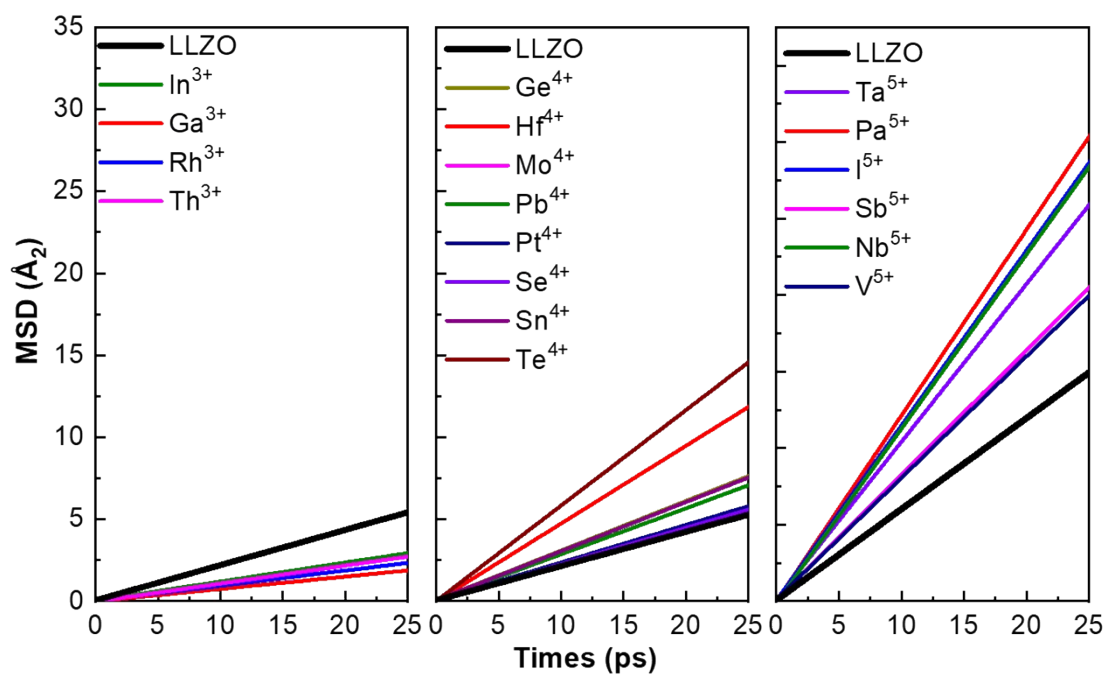

**Figure S3** MSD plots of  $\text{Li}^+$  in doped  $\text{Li}_{7+y}\text{La}_3\text{Zr}_{1.875}\text{M}_{0.125}\text{O}_{12}$  at 800 K in AIMD simulations. M is tri-valent, quadri-valent or pentad-valent element. The subscript of y varies to maintain electro-neutrality.

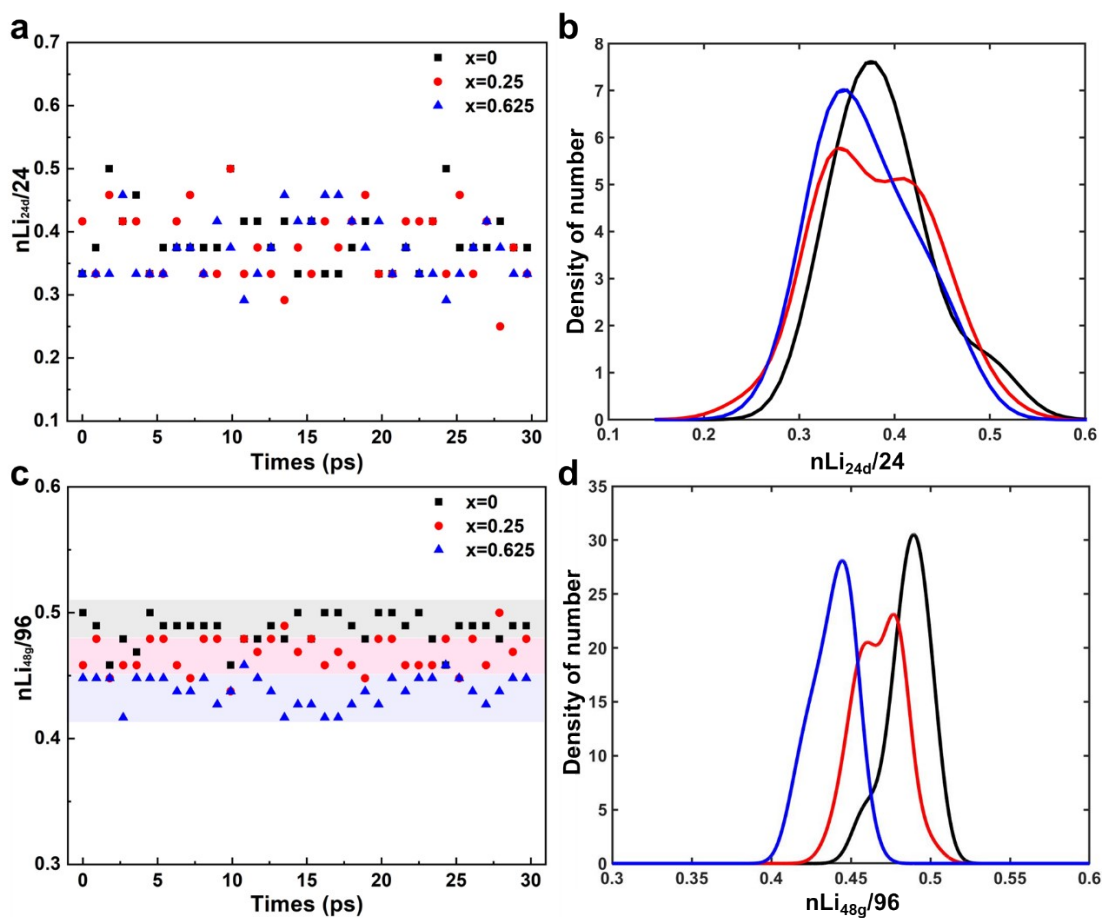

**Figure S4** (a) Occupancy ratio and (b) density of distribution of  $\text{Li}_{24d}$  in  $\text{Li}_{7-x}\text{La}_3\text{Zr}_{2-x}\text{Ta}_x\text{O}_{12}$  ( $x=0, 0.25, 0.625$ ) per ps during MD running at 1200 K for 30ps. (c) Occupancy ratio and (d) density of distribution of  $\text{Li}_{48g}$  in  $\text{Li}_{7-x}\text{La}_3\text{Zr}_{2-x}\text{Ta}_x\text{O}_{12}$  ( $x=0, 0.25, 0.625$ ) per ps during MD running at 1200 K for 30ps.

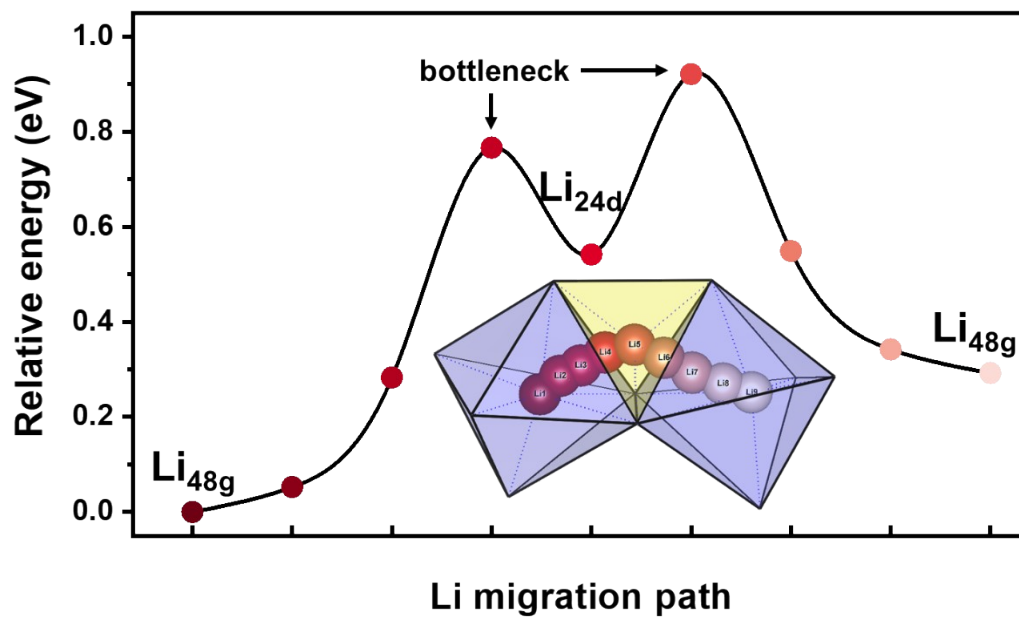

Figure S5 Single-ion migration of  $\text{Li}^+$  following the  $\text{Li}_{48g} \rightarrow \text{Li}_{24d} \rightarrow \text{Li}_{48g}$  trajectory.
